# Supplementary material
Source: Springer Nature journal article supplement (https://www.springermedizin.de/resource/supplementary/13256_2013_3185_MOESM4_ESM.pdf/9650190)

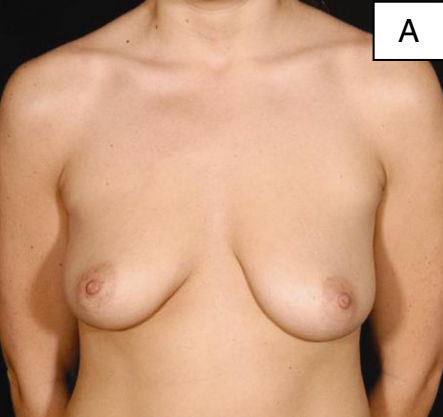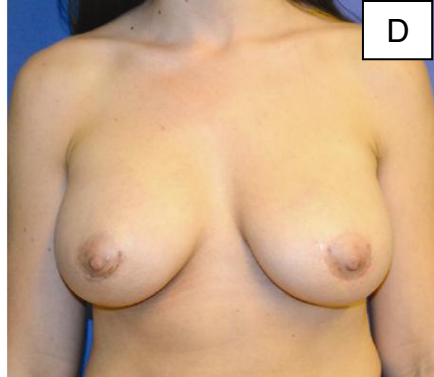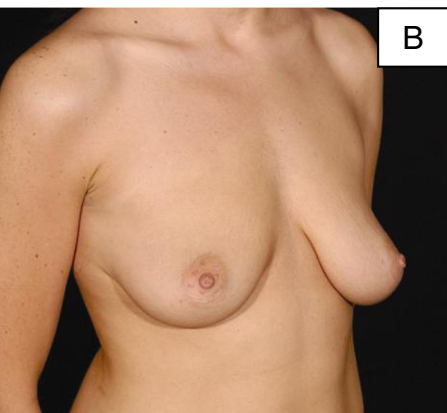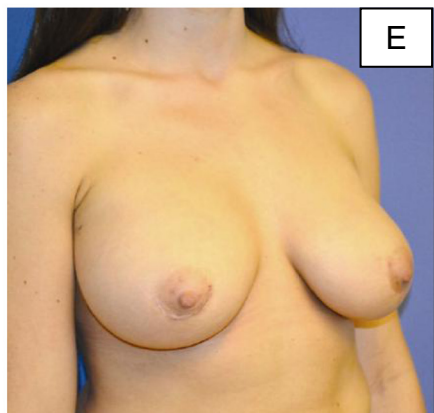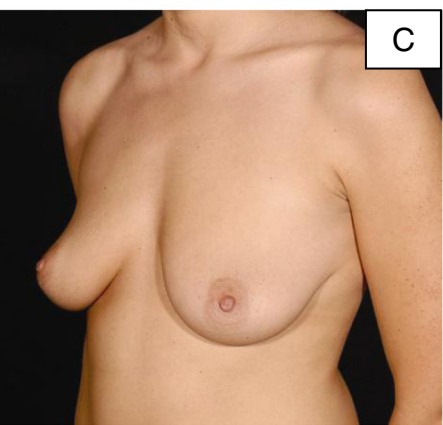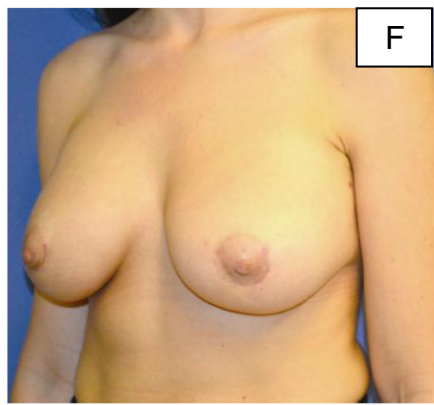

Supplement: MOESM4 [file 9650190]
